# Supplementary material for: Emotion Dysregulation in Attention Deficit Hyperactivity Disorder
Source: Atypon-hosted journal article supplement (doi:10.1176/appi.ajp.2013.13070966), 2014-01-31
Supplement: 276_ds001.pdf [file 276_ds001.pdf]

## Supplemental Methods

We conducted a literature search on PubMed, Web of Science, EMBASE and Google Scholar for articles published before January 1<sup>st</sup> 2013 using a Boolean conjunction operation between the search terms: [ADHD\* or attention deficit hyperactivity disorder, or hyperkinetic\* or impuls\*- title and abstract] and [emotion\*, mood\*, regulation\*, or labil\* or aggress\* or temperament\*- title]. This was supplemented with bibliographic cross-referencing and discussions with experts and yielded a total of 3209 studies. Case reports, conference abstracts and letters to editors were excluded and duplicates removed, full texts were retrieved and reviewed and 168 articles were finally included. Studies were categorized by the first author according to topic: (1) symptoms and impairment; (2) pathophysiology; and (3) treatment. Treatment studies were included if they included emotion regulation as an outcome, and had a randomized allocation to either an intervention or control wings (placebo in the case of pharmacological studies).

We summarized data quantitatively where possible, selecting studies for meta-analysis if they included a measure of central tendency and variance and there were at least five independent reports of the same construct, or measures which the lead author felt measured the same underlying construct. Quantitative syntheses were possible for emotion recognition (17 studies), aggressive behavior (12 studies) and measures of reward valuation (21 studies). As all the outcomes included in the meta-analysis were continuous, we calculated standardized mean differences. We used a random effects model to generate a pooled effect size and confidence intervals (CI) with the inverse variance method. Significance was determined by the z-test and heterogeneity was assessed by the  $I^2$  method. The results of the quantitative analyses shown in Figure 1 and the remaining studies are reviewed qualitatively.

For emotion recognition the main outcome variable was the accuracy of forced choice or free labeling of facial emotional expressions **(1-15)**. In one study participants were asked to rate the valence of positive and negative stimuli taken from the International Affective Picture System (16). In the Yuill and Lyon study subjects were asked to match facial expression with a scenario (17).

Reward valuation was assessed using paradigms which assess the preference for small immediate rewards over large delayed rewards. This is usually held to reflect an aversion to delay. In the most widely used paradigm participants are asked to choose between receiving 1 point at a 2 second delay (small, immediate reward) over a reward of 2 points delivered with a 30 second delay **(14, 18-31)**. In this paradigm there is no pause between trials and thus choosing a small immediate rewards is associated with shortened trails and less overall delay. Some variants of the task include a pause following each choice to equate the inter-trial interval (18, 26).

**TABLE S1. Experimental induction of behaviors linked to emotion dysregulation. All studies contrasted children with ADHD and typically developing (TypDev) controls.**

| Study                         | Participants                                                                                                           | Method                                                         | Findings                                                                                                                                                             |
|-------------------------------|------------------------------------------------------------------------------------------------------------------------|----------------------------------------------------------------|----------------------------------------------------------------------------------------------------------------------------------------------------------------------|
| Maedgen and Carlson 2000 (44) | ADHD-combined (N=16)<br>ADHD-inattentive (N=14)<br>TypDev (N=17)                                                       | Reaction to removal of a prize they had just won               | ADHD-combined showed more aggressive and emotionally 'intense' behaviors than ADHD-inattentive and TypDev, who did not differ.                                       |
| Walcott and Landau 2004 (45)  | Childhood ADHD (N=26)<br>TypDev (N=23)                                                                                 | Insoluble puzzle; in one condition, told to suppress response. | Degree of dysregulated behavior (e.g. shutting down, negative or disruptive behavior) greater in ADHD than TypDev, regardless of instructions to suppress responses. |
| Milich and Okazaki 1991 (46)  | Childhood ADHD (N=23)<br>TypDev (N=22)                                                                                 | Insoluble puzzle                                               | ADHD children solved fewer puzzles overall, stopped earlier, showed more negative affect and reported more frustration.                                              |
| Cole et al. 1994 (47)         | 79 children at high, medium or low risk for behavioral problems on basis of parent CBCL and Teacher Report Form        | Behavior during receipt of an undesirable gift                 | Boys at high risk and girls at low risk showed more negative behaviors when they thought they were unobserved, but not when in company of an adult.                  |
| Melnick and Henshaw (48)1996  | Childhood ADHD (N=27), divided into low and high aggression based on behaviors observed at summer school TypDev (N=18) | Behavior during a group competitive interaction task           | ADHD with high aggression were dominant, disruptive and attention-demanding compared to ADHD with low aggression and TypDev.                                         |

|                                |                                                                                                                                                              |                                                                                                    |                                                                                                    |
|--------------------------------|--------------------------------------------------------------------------------------------------------------------------------------------------------------|----------------------------------------------------------------------------------------------------|----------------------------------------------------------------------------------------------------|
| Scime and Norvilitis 2006 (49) | Childhood ADHD (N=21)<br>TypDev (N=20)                                                                                                                       | Complete a puzzle while blindfolded                                                                | ADHD more likely to quit task before completion.                                                   |
| Rosenbaum and Baker 1984 (50)  | Children divided into high (N=27) and low hyperactive (N=22) groups on Connors Teacher Report                                                                | Strategic problem solving tasks                                                                    | Hyperactive group showed decreased use of effective strategies and more negative affect.           |
| Douglas and Parry 1994 (51)    | ADHD-hyperactive-impulsive (N=30)<br>TypDev (N=30)                                                                                                           | Altering schedules of rewards and lever pulling to gain rewards as an index of induced frustration | ADHD reacted more 'frustrated' lever pulling ADHD showed stronger lever pulling when rewards lost. |
| Keltner et al 1995 (52)        | Based on CBCL, children stratified into: High externalizing (N=9)<br>High Internalizing (N=9)<br>High internalizing and externalizing (N=12) Controls (N=40) | Facial expressions during IQ testing                                                               | High externalizing group showed more negative expressions, especially anger.                       |

**TABLE S2. Studies linking temperament with symptoms of ADHD and emotional problems. RRR=relative risk ratio; ODD=oppositional defiant disorder.**

| LONGITUDINAL                     |                                   |                                                                                  |                                                                |                                                                                                                                                                                                                                                                                                                                                |
|----------------------------------|-----------------------------------|----------------------------------------------------------------------------------|----------------------------------------------------------------|------------------------------------------------------------------------------------------------------------------------------------------------------------------------------------------------------------------------------------------------------------------------------------------------------------------------------------------------|
|                                  |                                   | Time 1- temperament                                                              | Time 2- outcome                                                | Results                                                                                                                                                                                                                                                                                                                                        |
| Stringaris and Goodman 2009 (53) | Epidemiological<br>N=7140         | Emotionality, Sociability and activity at age 3.                                 | DSM-IV diagnosis at age 7                                      | ADHD predicted by early emotionality (RRR=1.26), sociability (RRR=1.33). Combined type and hyperactive-impulsive subtypes predicted by early activity (RRR 1.9 for combined and 4.25 for hyperactive). Emotionality also predicted later comorbid ADHD and internalizing disorder (RRR=1.59); Activity predicted later ADHD and ODD (RRR=3.24) |
| Goldsmith et al 2004 (54)        | Epidemiological<br>N=570 families | Observational measures in infancy                                                | Kindergarten: ADHD symptoms from Health Behavior Questionnaire | Correlations between parent and teacher ADHD symptom ratings and early temperamental anger (teacher 0.24; parent 0.14); high approach (teacher 0.37, parent 0.19); anticipatory behavior (teacher 0.25, parent 0.1)                                                                                                                            |
| Carlson et al 1995 (55)          | Epidemiological<br>N=191 families | Carey Infant temperament questionnaire: adaptability, approachability, alertness | Hyperactive symptoms from CBCL at age 6-8 and at age 11.       | Non-significant correlation between infant adaptability and hyperactivity at age 6.8 (r=0.1) and hyperactivity at age 11 (r =0.06)<br>Early measures of cognitive style, early caregiving style and contextual factors were stronger predictors of later                                                                                       |

|                            |                                                                  |                                                                                                                                                                    |                                                                                                                                |                                                                                                                                                                                                                                                                                          |
|----------------------------|------------------------------------------------------------------|--------------------------------------------------------------------------------------------------------------------------------------------------------------------|--------------------------------------------------------------------------------------------------------------------------------|------------------------------------------------------------------------------------------------------------------------------------------------------------------------------------------------------------------------------------------------------------------------------------------|
|                            |                                                                  |                                                                                                                                                                    |                                                                                                                                | hyperactivity.                                                                                                                                                                                                                                                                           |
| Olson et al 2002 (56)      | Epidemiological<br>N=89 families                                 | Age 1-2 years:<br>Observational and parent report: focused on toddler's resistance to control, fussiness, disengagement.<br>Bayley scales:<br>Cognitive competence | Age 8: during a range of task: observers rated a child's degree of inhibitory and behavioral control and tendency to disengage | No significant correlation between measures of inhibitory or behavioral control at age 8 and early temperament. Early cognitive competence was a stronger predictor than all temperamental measures.                                                                                     |
| Bates et al 1998 (57)      | Epidemiological<br>N=120 families                                | Age: 6 and 13 months<br>Infant Characteristics Questionnaire focused on resistance to control                                                                      | 8 years:<br>CBCL externalizing symptoms                                                                                        | Parent and teacher CBCL scores correlated with early resistance to controls (teacher $r=0.22$ ; parent $r=0.3$ ). Link was higher when mother was low in controlling behaviors                                                                                                           |
| Bates et al 1998 (57)      | Epidemiological<br>N=156 families                                | Age: 5 years<br>Retrospective recall of early infant temperament                                                                                                   | CBCL-externalizing symptoms                                                                                                    | Parent and teacher CBCL ratings correlated with early resistance to controls (teacher $r=0.14$ ; parent $r=0.32$ )                                                                                                                                                                       |
| CROSS-SECTIONAL            |                                                                  |                                                                                                                                                                    |                                                                                                                                |                                                                                                                                                                                                                                                                                          |
| Healey et al 2009 (58)     | Age 3-4 years<br>Case control<br>ADHD (N=140)<br>Controls (N=76) | Parent rating of ADHD symptoms<br>Teacher temperament Assessment Battery of Children<br>Neuropsychological battery (NEPSY)                                         |                                                                                                                                | High negative emotionality associated with ADHD symptoms regardless of cognitive ability. For ADHD with low negative emotionality, high cognitive abilities impacted on level of ADHD symptoms. For typicals, high cognitive ability protected against effects of negative emotionality. |
| Martel and Nigg, 2006 (59) | Age 6-12 years<br>Case control                                   | Early Adolescent Temperament Questionnaire and California Q-sort                                                                                                   |                                                                                                                                | Negative emotionality associated with ADHD symptoms by parent but not teacher                                                                                                                                                                                                            |

|  |                                                                            |  |                                                                                                                                                                                                                                                                                                                                                                  |
|--|----------------------------------------------------------------------------|--|------------------------------------------------------------------------------------------------------------------------------------------------------------------------------------------------------------------------------------------------------------------------------------------------------------------------------------------------------------------|
|  | <p>ADHD (N=92)<br/>Symptoms of<br/>ADHD (N=35)<br/>Controls<br/>(N=52)</p> |  | <p>report, and with oppositional symptoms. Cognitive control style linked with ADHD domains (effortful control protected against inattention; reactive control style associated with hyperactive-impulsive symptoms).<br/>Effortful and more controlled cognitive style 'protected' against ADHD symptoms in the presence of low negative emotionality only.</p> |
|--|----------------------------------------------------------------------------|--|------------------------------------------------------------------------------------------------------------------------------------------------------------------------------------------------------------------------------------------------------------------------------------------------------------------------------------------------------------------|

## SUPPLEMENTAL REFERENCES

1. Boakes J, Chapman E, Houghton S, West J. Facial affect interpretation in boys with attention deficit/hyperactivity disorder. *Child Neuropsychology*. 2007;14(1):82-96.
2. Sinzig J, Morsch D, Lehmkuhl G. Do hyperactivity, impulsivity and inattention have an impact on the ability of facial affect recognition in children with autism and ADHD? *Eur Child Adolesc Psychiatry*. 2008;17(2):63-72.
3. Rapport LJ, Friedman SL, Tzelepis A, Van Voorhis A. Experienced emotion and affect recognition in adult attention-deficit hyperactivity disorder. *Neuropsychology*. 2002;16(1):102-10.
4. Dyck MJ, Ferguson K, Shochet IM. Do autism spectrum disorders differ from each other and from non-spectrum disorders on emotion recognition tests? *Eur Child Adolesc Psychiatry*. 2001;10(2):105-16.
5. Pelc K, Kornreich C, Foisy M-L, Dan B. Recognition of emotional facial expressions in attention-deficit hyperactivity disorder. *Pediatr Neurol*. 2006;35(2):93-7.
6. Shin D, Lee S, Kim B, Park Y, Lim S. Visual attention deficits contribute to impaired facial emotion recognition in boys with attention-deficit/hyperactivity disorder. *Neuropediatrics*. 2008;39(6):323.
7. Cadesky EB, Mota VL, Schachar RJ. Beyond words: How do children with ADHD and/or conduct problems process nonverbal information about affect? *J Am Acad Child Adolesc Psychiatry*. 2000;39(9):1160-7.
8. Da Fonseca D, Seguier Vr, Santos A, Poinso Fo, Deruelle C. Emotion understanding in children with ADHD. *Child Psychiatry Hum Dev*. 2009;40(1):111-21.
9. Malisza KL, Clancy C, Shiloff D, Holden J, Jones C, Paulson K, et al. Functional magnetic resonance imaging of facial information processing in children with autistic disorder, attention deficit hyperactivity disorder and typically developing controls. *International Journal of Adolescent Medicine and Health*. 2011;23(3):269-77.
10. Corbett B, Glidden H. Processing affective stimuli in children with attention-deficit hyperactivity disorder. *Child Neuropsychology*. 2000;6(2):144-55.
11. Seymour KE, Pescosolido MF, Reidy BL, Galvan T, Kim KL, Young M, et al. Emotional Face Identification in Youths With Primary Bipolar Disorder or Primary Attention-Deficit/Hyperactivity Disorder. *J Am Acad Child Adolesc Psychiatry*. 2013;52(5):537-46. e3.
12. Downs A, Smith T. Emotional understanding, cooperation, and social behavior in high-functioning children with autism. *Journal of autism and developmental disorders*. 2004;34(6):625-35.
13. Greenbaum RL, Stevens SA, Nash K, Koren G, Rovet J. Social Cognitive and Emotion Processing Abilities of Children With Fetal Alcohol Spectrum Disorders: A Comparison With Attention Deficit Hyperactivity Disorder. *Alcoholism: Clinical and Experimental Research*. 2009;33(10):1656-70.
14. Sjowall D, Roth L, Lindqvist S, Thorell LB. Multiple deficits in ADHD: executive dysfunction, delay aversion, reaction time variability, and emotional deficits. *Journal of Child Psychology and Psychiatry*. 2012.
15. Miller M, Hanford RB, Fassbender C, Duke M, Schweitzer JB. Affect recognition in adults with ADHD. *J Atten Disord*. 2011;15(6):452-60.



16. Herpertz SC, Huebner T, Marx I, Vloet TD, Fink GR, Stoecker T, et al. Emotional processing in male adolescents with childhood-onset conduct disorder. *Journal of Child Psychology and Psychiatry*. 2008;49(7):781-91.
17. Yuill N, Lyon J. Selective difficulty in recognising facial expressions of emotion in boys with ADHD. *Eur Child Adolesc Psychiatry*. 2007;16(6):398-404.
18. Banaschewski T, Jennen, Steinmetz C, Brandeis D, Buitelaar JK, Kuntsi J, Poustka L, et al. Neuropsychological correlates of emotional lability in children with ADHD. *Journal of Child Psychology and Psychiatry*. 2012.
19. Plichta MM, Vasic N, Wolf RC, Lesch K-P, Brummer D, Jacob C, et al. Neural hypo-responsiveness and hyper-responsiveness during immediate and delayed reward processing in adult attention-deficit/hyperactivity disorder. *Biol Psychiatry*. 2009;65(1):7-14.
20. Antrop I, Stock P, Verte S, Wiersma JR, Baeyens D, Roeyers H. ADHD and delay aversion: the influence of non-temporal stimulation on choice for delayed rewards. *Journal of Child Psychology and Psychiatry*. 2006;47(11):1152-8.
21. Bidwell L, Willcutt EG, DeFries JC, Pennington BF. Testing for neuropsychological endophenotypes in siblings discordant for attention-deficit/hyperactivity disorder. *Biol Psychiatry*. 2007;62(9):991-8.
22. Bitsakou P, Psychogiou L, Thompson M, Sonuga-Barke EJ. Delay aversion in attention deficit/hyperactivity disorder: an empirical investigation of the broader phenotype. *Neuropsychologia*. 2009;47(2):446-56.
23. Dalen L, Sonuga-Barke EJ, Hall M, Remington B. Inhibitory deficits, delay aversion and preschool AD/HD: implications for the dual pathway model. *Neural Plasticity*. 2004;11(1-2):1-11.
24. Karalunas SL, Huang-Pollock CL. Examining relationships between executive functioning and delay aversion in attention deficit hyperactivity disorder. *Journal of Clinical Child & Adolescent Psychology*. 2011;40(6):837-47.
25. Kuntsi J, Oosterlaan J, Stevenson J. Psychological mechanisms in hyperactivity: I. Response inhibition deficit, working memory impairment, delay aversion, or something else? *J Child Psychol Psychiatry*. 2001;42(2):199-210.
26. Marco R, Miranda A, Schlotz W, Melia A, Mulligan A, Müller U, et al. Delay and reward choice in ADHD: An experimental test of the role of delay aversion. *Neuropsychology*. 2009;23(3):367.
27. Marx I, Habner T, Herpertz SC, Berger C, Reuter E, Kircher T, et al. Cross-sectional evaluation of cognitive functioning in children, adolescents and young adults with ADHD. *J Neural Transm*. 2010;117(3):403-19.
28. Solanto MV, Gilbert SN, Raj A, Zhu J, Pope-Boyd S, Stepak B, et al. Neurocognitive functioning in AD/HD, predominantly inattentive and combined subtypes. *J Abnorm Child Psychol*. 2007;35(5):729-44.
29. Solanto MV, Abikoff H, Sonuga-Barke E, Schachar R, Logan GD, Wigal T, et al. The ecological validity of delay aversion and response inhibition as measures of impulsivity in AD/HD: a supplement to the NIMH multimodal treatment study of AD/HD. *J Abnorm Child Psychol*. 2001;29(3):215-28.
30. Vloet T, Marx I, Kahraman-Lanzerath B, Zepf F, Herpertz-Dahlmann B, Konrad K. Neurocognitive Performance in Children with ADHD and OCD. *J Abnorm Child Psychol*. 2010;38(7):961-9.

31. Yang B, Chan R, Gracia N, Cao X, Zou X, Jing J, et al. Cool and hot executive functions in medication-naive attention deficit hyperactivity disorder children. *Psychol Med*. 2011;41(12):2593-602.
32. Zalecki CA, Hinshaw SP. Overt and relational aggression in girls with attention deficit hyperactivity disorder. *Journal of clinical child and adolescent psychology*. 2004;33(1):125-37.
33. Hoza B, Murray-Close D, Arnold LE, Hinshaw SP, Hechtman L, Group MC. Time-dependent changes in positively biased self-perceptions of children with attention-deficit/hyperactivity disorder: A developmental psychopathology perspective. *Development and psychopathology*. 2010;22(2):375.
34. Mikami AY, Ransone ML, Calhoun CD. Influence of Anxiety on the Social Functioning of Children With and Without ADHD. *J Atten Disord*. 2011;15(6):473-84.
35. Greene RW, Biederman J, Faraone SV, Ouellette CA, Penn C, Griffin SM. Toward a new psychometric definition of social disability in children with attention-deficit hyperactivity disorder. *J Am Acad Child Adolesc Psychiatry*. 1996;35(5):571-8.
36. Matthys W, Cuperus JM, Engeland HV. Deficient social problem-solving in boys with ODD/CD, with ADHD, and with both disorders. *J Am Acad Child Adolesc Psychiatry*. 1999;38(3):311-21.
37. Ohan JL, Johnston C. Positive illusions of social competence in girls with and without ADHD. *J Abnorm Child Psychol*. 2011;39(4):527-39.
38. McQuade JD, Vaughn AJ, Hoza B, Murray-Close D, Molina BS, Arnold LE, et al. Perceived Social Acceptance and Peer Status Differentially Predict Adjustment in Youth With and Without ADHD. *J Atten Disord*. 2012.
39. Waschbusch DA, Pelham Jr WE, Jennings JR, Greiner AR, Tarter RE, Moss HB. Reactive aggression in boys with disruptive behavior disorders: behavior, physiology, and affect. *J Abnorm Child Psychol*. 2002;30(6):641-56.
40. King S, Waschbusch DA, Pelham WE, Frankland BW, Corkum PV, Jacques S. Subtypes of aggression in children with attention deficit hyperactivity disorder: medication effects and comparison with typical children. *Journal of Clinical Child & Adolescent Psychology*. 2009;38(5):619-29.
41. Buhrmester D, Whalen CK, Henker B, MacDonald V, Hinshaw SP. Prosocial behavior in hyperactive boys: Effects of stimulant medication and comparison with normal boys. *J Abnorm Child Psychol*. 1992;20(1):103-21.
42. Erhardt D, Hinshaw SP. Initial sociometric impressions of attention-deficit hyperactivity disorder and comparison boys: Predictions from social behaviors and from nonbehavioral variables. *Journal of Consulting and Clinical Psychology*. 1994;62(4):833.
43. Abikoff H, Jensen P, Arnold L, Hoza B, Hechtman L, Pollack S, et al. Observed classroom behavior of children with ADHD: relationship to gender and comorbidity. *J Abnorm Child Psychol*. 2002;30:349 - 59.
44. Maedgen JW, Carlson CL. Social functioning and emotional regulation in the attention deficit hyperactivity disorder subtypes. *Journal of Clinical Child Psychology*. 2000;29(1):30-42.
45. Walcott CM. The relation between disinhibition and emotion regulation in boys with attention deficit hyperactivity disorder. *Journal of clinical child and adolescent psychology*. 2004;33(4):772.

46. Milich R, Okazaki M. An examination of learned helplessness among attention-deficit hyperactivity disorder boys. *J Abnorm Child Psychol.* 1991;19(5):607-23.
47. Cole PM, Zahn-Waxler C, Smith KD. Expressive control during a disappointment: Variations related to preschoolers' behavior problems. *Developmental Psychology.* 1994;30(6):835-46.
48. Melnick SM, Hinshaw SP. What they want and what they get: The social goals of boys with ADHD and comparison boys. *J Abnorm Child Psychol.* 1996;24(2):169-85.
49. Scime M, Norvilitis JM. Task performance and response to frustration in children with attention deficit hyperactivity disorder. *Psychology in the Schools.* 2006;43(3):377-86.
50. Rosenbaum M, Baker E. Self-control behavior in hyperactive and nonhyperactive children. *J Abnorm Child Psychol.* 1984;12(2):303-17.
51. Douglas V, Parry P. Effects of reward and nonreward on frustration and attention in attention deficit disorder. *J Abnorm Child Psychol.* 1994;22(3):281-302.
52. Keltner D, Moffitt TE, Stouthamer-Loeber M. Facial expressions of emotion and psychopathology in adolescent boys. *J Abnorm Psychol.* 1995;104(4):644-52.
53. Stringaris A, Goodman R. Mood lability and psychopathology in youth. *Psychol Med.* 2009;39(08):1237-45.
54. Goldsmith H, Lemery K, Essex M. Roles for temperament in the liability to psychopathology in childhood. *Behavior genetic principles-Development, personality, and psychopathology.* 2004.
55. Carlson EA, Jacobvitz D, Sroufe LA. A Developmental Investigation of Inattentiveness and Hyperactivity. *Child Dev.* 1995;66(1):37-54.
56. Olson SL, Bates JE, Sandy JM, Schilling EM. Early developmental precursors of impulsive and inattentive behavior: From infancy to middle childhood. *Journal of Child Psychology and Psychiatry.* 2002;43(4):435-47.
57. Bates JE, Pettit GS, Dodge KA, Ridge B. Interaction of temperamental resistance to control and restrictive parenting in the development of externalizing behavior. *Developmental Psychology.* 1998;34(5):982-95.
58. Healey DM, Brodzinsky LK, Bernstein M, Rabinovitz B, Halperin JM. Moderating effects of neurocognitive abilities on the relationship between temperament and global functioning. *Child Neuropsychology.* 2009;16(1):20-31.
59. Martel MM, Nigg JT. Child ADHD and personality/temperament traits of reactive and effortful control, resiliency, and emotionality. *Journal of Child Psychology and Psychiatry.* 2006;47(11):1175-83.
